# Supplementary material for: Primary Pulmonary Mucoepidermoid Carcinoma: Histopathological and Moleculargenetic Studies of 26 Cases
Source: PubMed Central journal article supplement (PMC4648574; doi:10.1371/journal.pone.0143169), 2015-11-17
Supplement: pone.0143169.s001.pdf [file pone.0143169.s001.pdf]

**S1 Table. Clinicopathological, immunohistochemical, and fluorescence in situ hybridization detailed data of 26 patients with pulmonary mucoepidermoid carcinoma**

| No. | Age, yr / gender | Location                        | Symptoms                   | Surgery              | Histological grade | IHC findings |     |        |     |     |      |     |       | MAML2 arrangement | Follow-up time, mo | RT/ CHT | Recurrence or metastasis (sites) | Death                                     |       |
|-----|------------------|---------------------------------|----------------------------|----------------------|--------------------|--------------|-----|--------|-----|-----|------|-----|-------|-------------------|--------------------|---------|----------------------------------|-------------------------------------------|-------|
|     |                  |                                 |                            |                      |                    | TTF-1        | CK7 | Muc5Ac | p63 | p40 | EGFR | ALK | HER-2 |                   |                    |         |                                  |                                           | Ki-67 |
| 1   | 61/<br>Female    | Lower right lobe                | Cough, hemoptysis, dyspnea | Yes                  | High-grade         | -            | +   | +      | +   | +   | +    | -   | -     | 15                | No                 | 34      | No                               | Yes (bone, adrenal gland, and lymph node) | Yes   |
| 2   | 46/<br>Female    | Left main bronchus              | Dyspnea                    | Yes                  | High-grade         | -            | +   | +      | +   | +   | +    | -   | -     | 7                 | No                 | 55      | No                               | No                                        | No    |
| 3   | 34/<br>Male      | Trachea                         | Cough, hemoptysis          | Yes, focal resection | Low-grade          | -            | +   | +      | +   | +   | -    | -   | -     | 5                 | Yes                | 76      | RT                               | No                                        | No    |
| 4   | 51/<br>Female    | Trachea                         | Dyspnea                    | Yes                  | Low-grade          | -            | +   | +      | +   | +   | +    | -   | -     | 3                 | No                 | 36      | No                               | No                                        | No    |
| 5   | 79/<br>Male      | Lower left segmental bronchus   | Cough, hemoptysis          | Yes                  | High-grade         | -            | +   | +      | +   | +   | +    | -   | -     | 25                | No                 | 33      | No                               | Yes (brain)                               | Yes   |
| 6   | 45/<br>Female    | Middle right segmental bronchus | Cough, fever               | Yes                  | Low-grade          | -            | +   | +      | +   | +   | -    | -   | -     | 2                 | Yes                | 93      | RT                               | No                                        | No    |

|    |               |                                          |                                   |                    |             |   |   |   |   |   |   |   |   |    |         |     |             |            |             |
|----|---------------|------------------------------------------|-----------------------------------|--------------------|-------------|---|---|---|---|---|---|---|---|----|---------|-----|-------------|------------|-------------|
| 7  | 39/<br>Female | Lower left<br>segmental<br>bronchus      | Cough                             | Yes                | Low-grade   | - | + | + | + | + | - | - | - | 5  | Unknown | 153 | No          | No         | No          |
| 8  | 58/<br>Male   | Upper<br>right<br>lobe                   | Chest pain                        | Yes                | High-grade  | - | + | + | + | + | - | - | - | 80 | No      | 0   | Unkno<br>wn | Unknown    | Unkno<br>wn |
| 9  | 40/<br>Male   | Middle<br>right<br>segmental<br>bronchus | Hemoptysi<br>s                    | Yes                | Low-grade   | - | + | + | + | + | - | - | - | 5  | Yes     | 35  | CHT         | No         | No          |
| 10 | 17/<br>Female | Trachea                                  | Hemoptysi<br>s, dyspnea           | Yes                | Low-grade   | - | + | + | + | + | + | - | - | 5  | Unknown | 21  | No          | No         | No          |
| 11 | 42/<br>Male   | Upper<br>right<br>segmental<br>bronchus  | Cough,<br>hemoptysis<br>, dyspnea | Yes                | Low-grade   | - | + | + | + | + | - | - | - | 5  | Unknown | 8   | No          | No         | No          |
| 12 | 32/<br>Female | Lower left<br>lobe                       | Cough,<br>hemoptysis              | Yes                | Low-grade   | - | + | + | + | + | - | - | - | 2  | Yes     | 22  | No          | No         | No          |
| 13 | 50/<br>Female | Upper left<br>segmental<br>bronchus      | Cough,<br>hoarseness              | No, only<br>biopsy | High -grade | - | + | + | + | + | + | - | - | 12 | Unknown | 30  | CHT         | Yes (bone) | Yes         |
| 14 | 27/<br>Male   | Upper<br>right lobe<br>bronchus          | Asymptom                          | Yes                | Low-grade   | - | + | + | + | + | - | - | - | 4  | Unknown | 31  | No          | No         | No          |
| 15 | 54/<br>Female | Lower<br>right lobe                      | Asymptom                          | Yes                | Low-grade   | - | + | + | + | + | - | - | - | 2  | Unknown | 123 | RT/<br>CHT  | No         | No          |

|    |               |                                          |                                                  |                    |             |   |   |   |   |   |   |   |   |    |         |     |             |         |             |
|----|---------------|------------------------------------------|--------------------------------------------------|--------------------|-------------|---|---|---|---|---|---|---|---|----|---------|-----|-------------|---------|-------------|
|    |               | bronchus                                 |                                                  |                    |             |   |   |   |   |   |   |   |   |    |         |     |             |         |             |
| 16 | 58/<br>Male   | Lower left<br>lobe<br>bronchus           | Cough,<br>hemoptysis<br>, dyspnea,<br>chest pain | Yes                | Low-grade   | - | + | + | + | + | - | - | - | 3  | Yes     | 33  | CHT         | No      | No          |
| 17 | 41/<br>Male   | Lower left<br>segmental<br>bronchus      | Cough                                            | Yes                | Low-grade   | - | + | + | + | + | - | - | - | 2  | No      | 170 | CHT         | No      | No          |
| 18 | 12/<br>Female | Upper left<br>lobe<br>bronchus           | Cough                                            | Yes                | Low-grade   | - | + | + | + | + | - | - | - | 7  | Yes     | 0   | Unkno<br>wn | Unknown | Unkno<br>wn |
| 19 | 67/<br>Male   | Lower left<br>lobe<br>bronchus           | Asymptom                                         | No, only<br>biopsy | High -grade | - | + | + | + | + | + | - | - | 15 | Unknown | 7   | No          | No      | Yes         |
| 20 | 28/<br>Male   | Middle<br>right<br>segmental<br>bronchus | Hemoptysi<br>s                                   | Yes                | High -grade | - | + | + | + | + | - | - | - | 10 | Yes     | 21  | No          | No      | No          |
| 21 | 68/<br>Female | Trachea                                  | Hemoptysi<br>s                                   | Yes                | Low-grade   | - | + | + | + | + | - | - | - | 5  | Yes     | 27  | RT          | No      | No          |
| 22 | 40/<br>Female | Lower<br>right lobe<br>bronchus          | Cough                                            | Yes                | Low-grade   | - | + | + | + | + | - | - | - | 2  | Yes     | 0   | Unkno<br>wn | Unknown | Unkno<br>wn |
| 23 | 67/<br>Male   | Lower<br>right lobe                      | Cough                                            | Yes                | High -grade | - | + | + | + | + | + | - | - | 15 | Yes     | 30  | No          | No      | No          |

|    |               |                                |                      |                    |           |   |   |   |   |   |   |   |   |   |        |    |            |           |                                |
|----|---------------|--------------------------------|----------------------|--------------------|-----------|---|---|---|---|---|---|---|---|---|--------|----|------------|-----------|--------------------------------|
| 24 | 72/<br>Male   | Lower left<br>lobe<br>bronchus | Asymptom             | No, only<br>biopsy | Low-grade | - | + | + | + | + | + | - | - | 5 | Unkown | 31 | No         | Uncertain | No<br>(survival with<br>tumor) |
| 25 | 40/<br>Male   | Right<br>main<br>bronchus      | Cough,<br>hemoptysis | Yes                | Low-grade | - | + | + | + | + | + | - | - | 5 | Yes    | 9  | RT/<br>CHT | No        | No                             |
| 26 | 40/<br>Female | Lower left<br>lobe<br>bronchus | Cough,<br>dyspnea    | Yes                | Low-grade | - | + | + | + | + | + | - | - | 7 | Yes    | 9  | No         | No        | No                             |

---

RT, radiotherapy  
CHT, chemotherapy
